# Supplementary material
Source: PubMed Central journal article supplement (PMC3084602)

# Supplementary figures

Supplementary Fig. 1

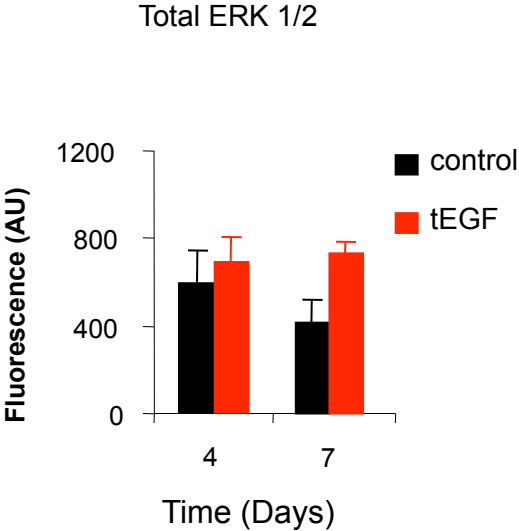

Supplementary Fig. 2

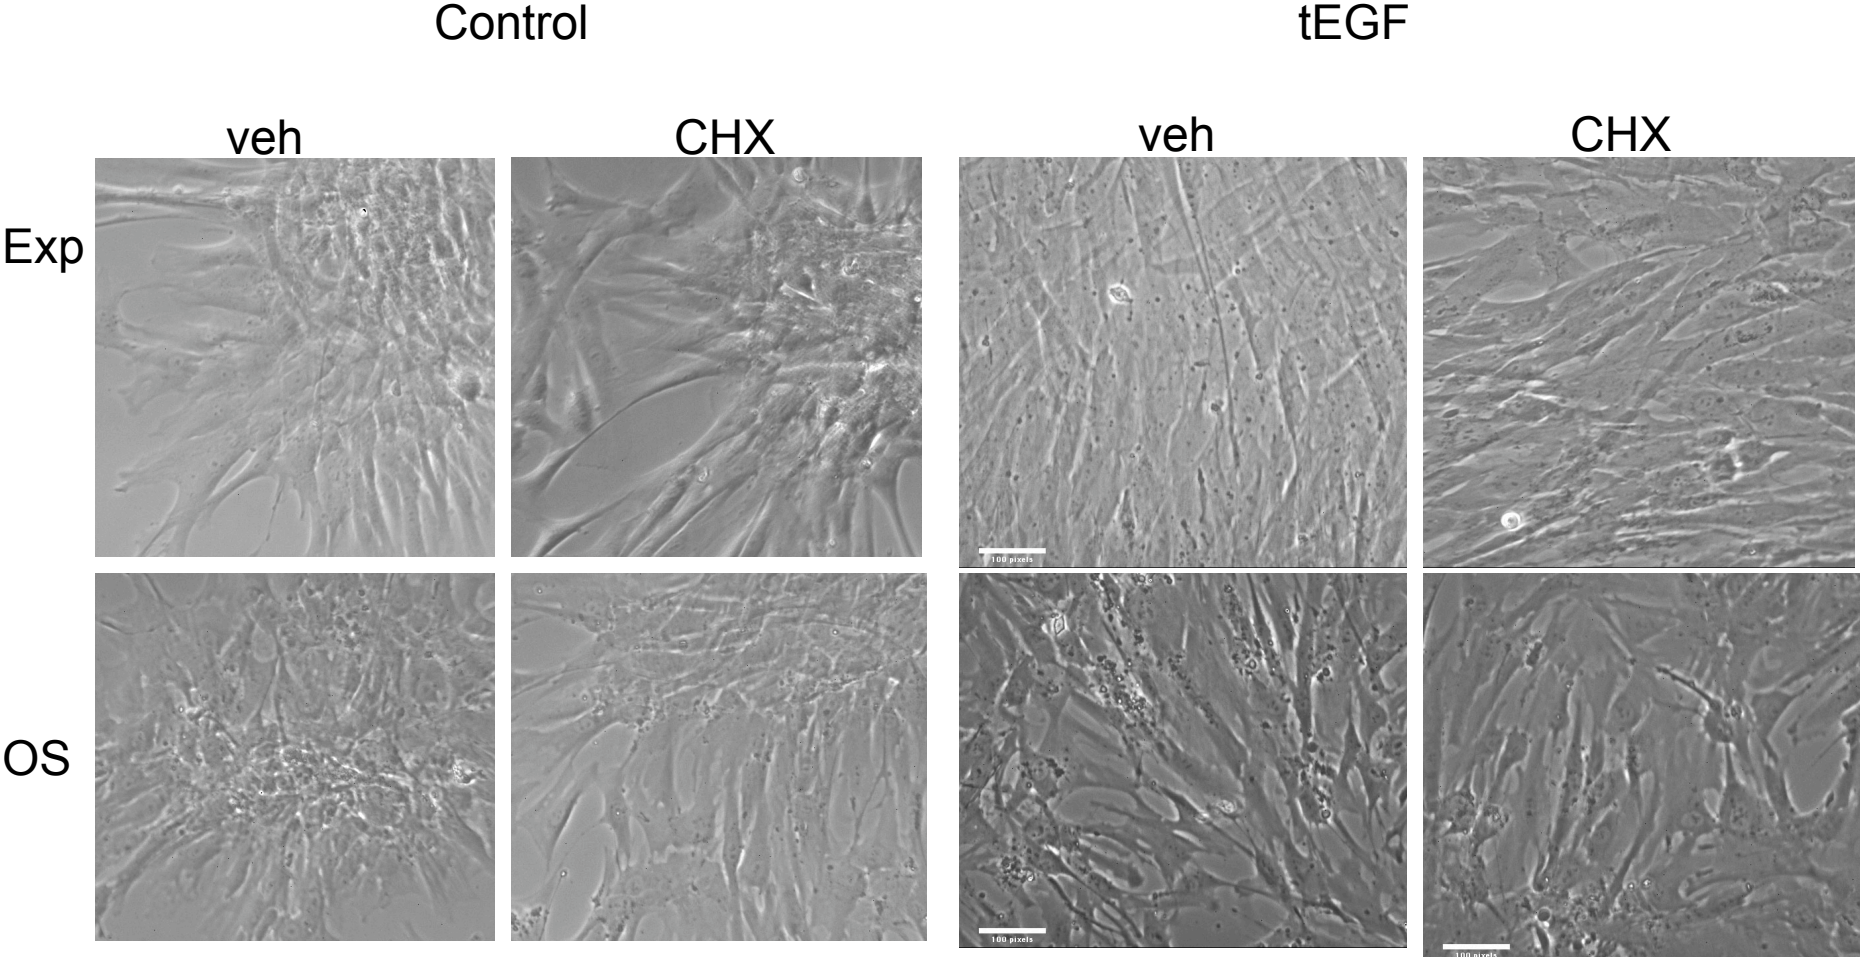

Supplementary Fig. 3

$$dL / dt \leq -K_e R_t \rho / N_{av}$$

$$K_e \rightarrow \text{Endocytosis Constant} \rightarrow 10^{-1} \text{min}^{-1}$$

$$R_t \rightarrow \text{\# of Receptors/cell} \rightarrow 3 \times 10^3 \text{\#/cell}$$

$$\rho \rightarrow \text{Density of cells/volume} \rightarrow (5 \times 10^4 \text{ cell/ml}) \times 10^3 \text{ml/l}$$

$$N_{av} \rightarrow \text{Avogadro's \#} \rightarrow 6 \times 10^{23} \text{\#/mole}$$

$$dL / dt \leq -3.6 \times 10^{-11} \text{mol} / \text{day} \cdot l$$

$$\text{If } L_0 = 0.5 \text{ ng/ml} = 8.3 \times 10^{-11} \text{ moles/l}$$

~43% ligand depleted each day

Media changed every third day

Review figures

Review Fig 1

# Dose curve of AG1478

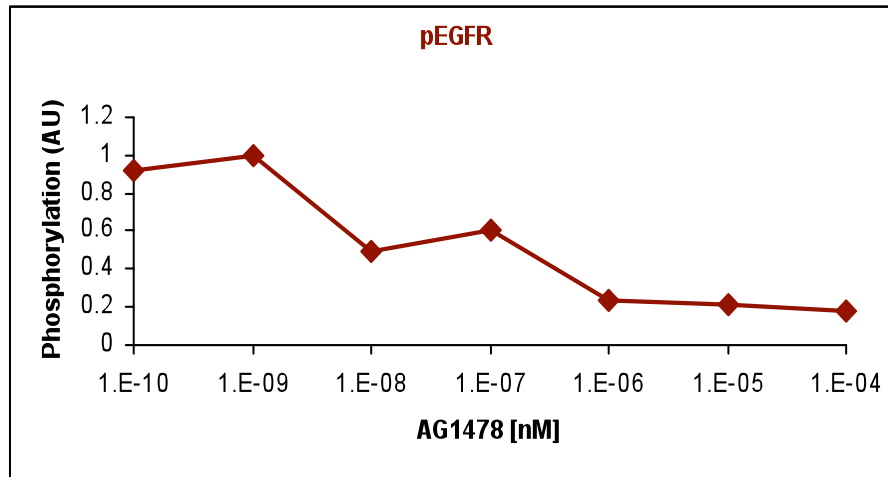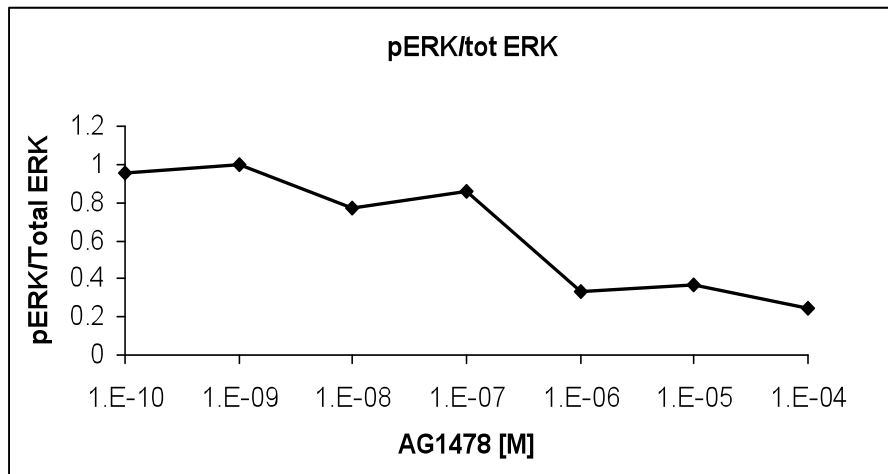

Supplement: NIHMS119633-supplement-supplement_1.pdf [file NIHMS119633-supplement-supplement_1.pdf]
